# Supplementary material
Source: PubMed Central journal article supplement (PMC8783386)
Supplement: cvab074_supplementary_data.pdf [file cvab074_supplementary_data.pdf]

**Targeted delivery of Protein Arginine Deiminase-4 inhibitors to limit arterial  
intimal NETosis and preserve endothelial integrity**

Roberto Molinaro<sup>a, b, 1</sup>, Mikyung Yu<sup>c, 1</sup>, Grasiela Sausen<sup>a</sup>, Colette A. Bichsel<sup>d</sup>, Claudia Corbo<sup>c, e</sup>,  
Eduardo J. Folco<sup>a</sup>, Gha Young Lee<sup>c</sup>, Yuan Liu<sup>c</sup>, Yevgenia Tesmenitsky<sup>a</sup>, Eugenia Shvartz<sup>a</sup>,  
Galina K. Sukhova<sup>a</sup>, Frederik Kloss<sup>a</sup>, Kevin J. Croce<sup>a</sup>, Omid C. Farokhzad<sup>c</sup>, Jinjun Shi<sup>c, 2</sup>, Peter  
Libby<sup>a, 2</sup>

**SUPPLEMENTAL MATERIAL**

Supplementary Figure 1

| Legend | Heptapeptide density (%) |
|--------|--------------------------|
| NP1    | -                        |
| NP2    | 1                        |
| NP3    | 5                        |
| NP4    | 7.5                      |
| NP5    | 15                       |
| NP6    | 30                       |

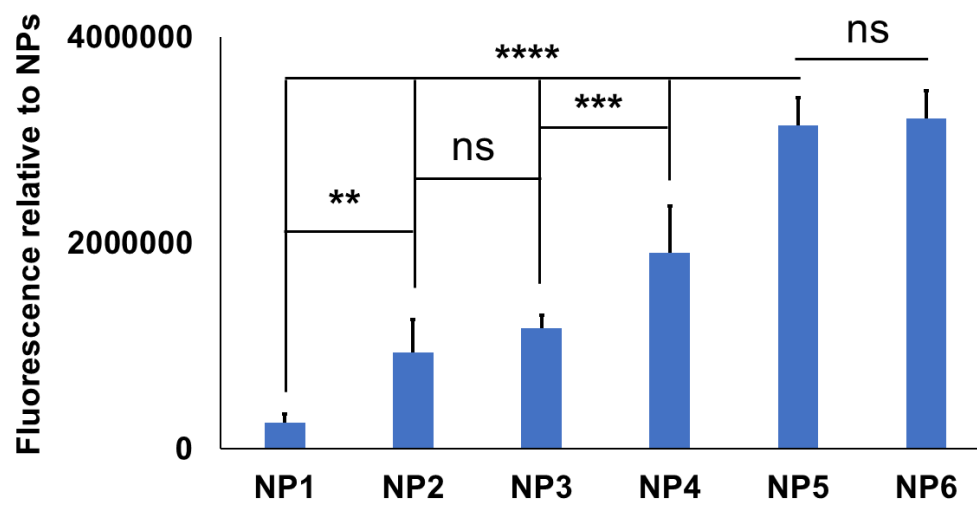

Supplementary Figure 2

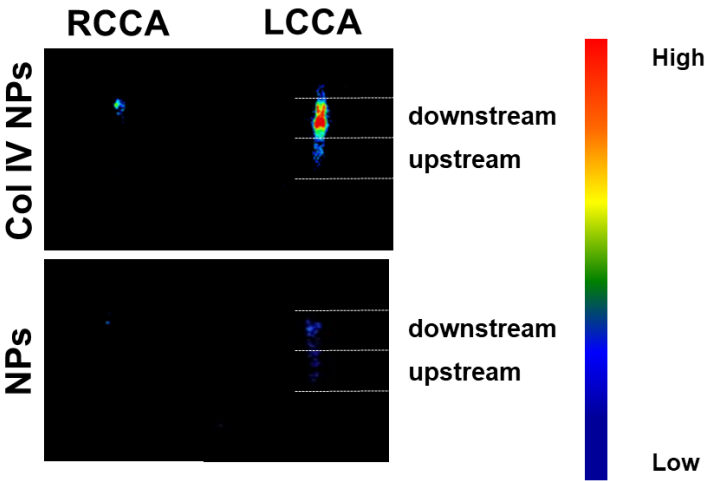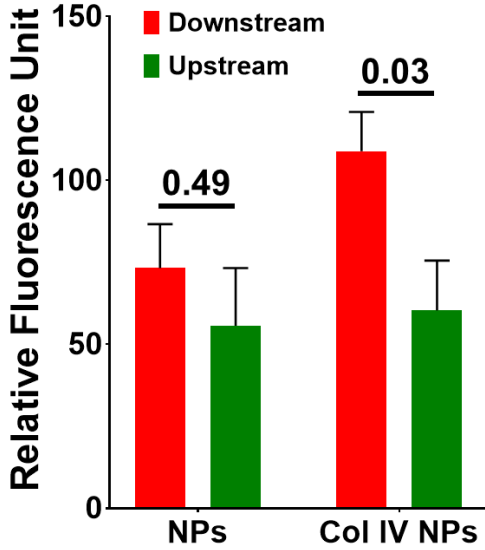

Supplementary Figure 3

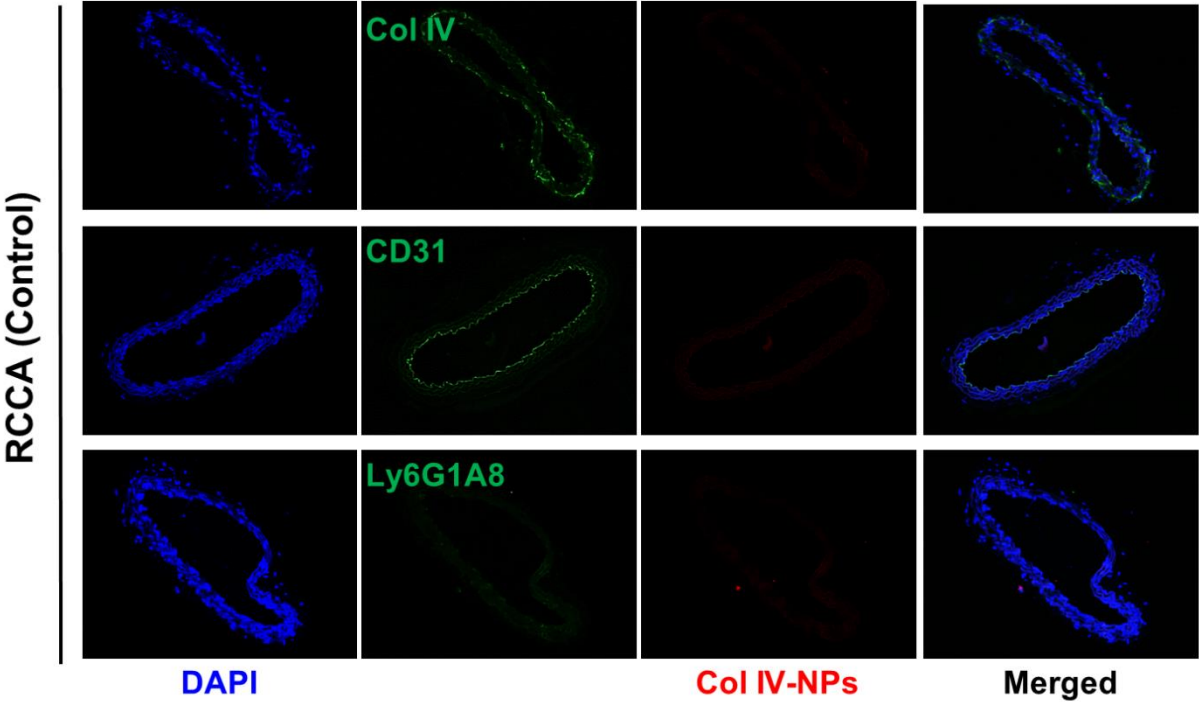

Supplementary Figure 4

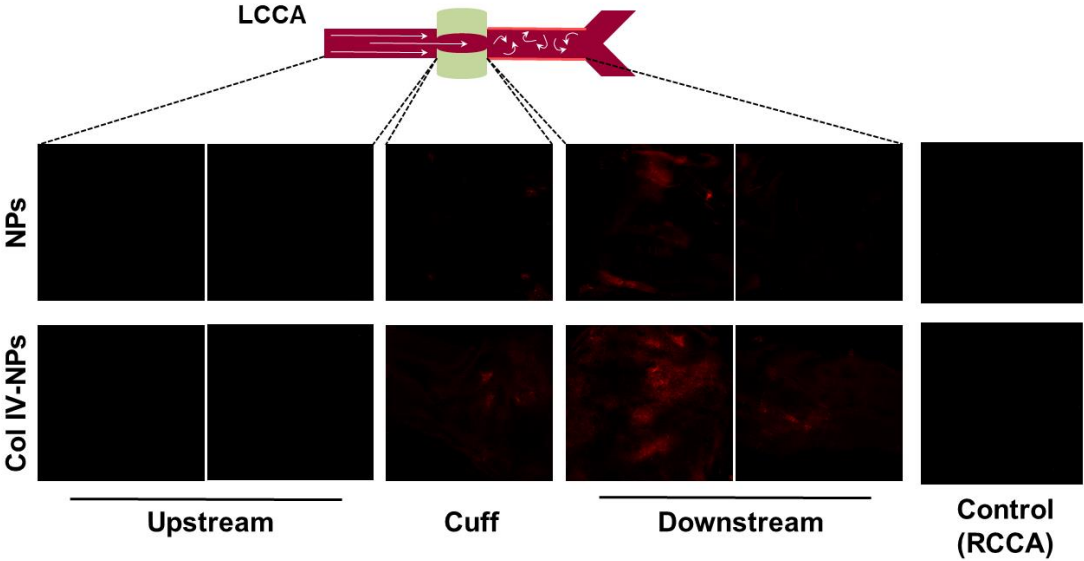

Supplementary Figure 5

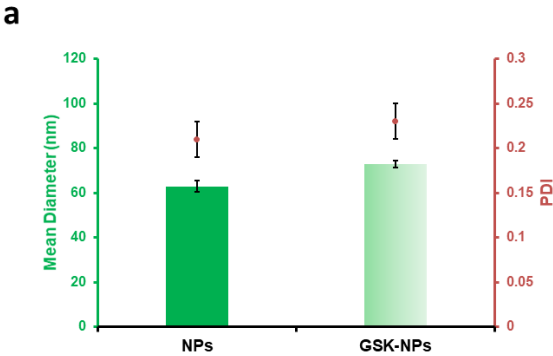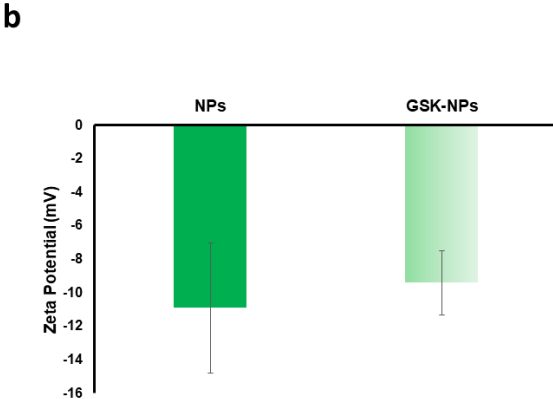

Supplementary Figure 6

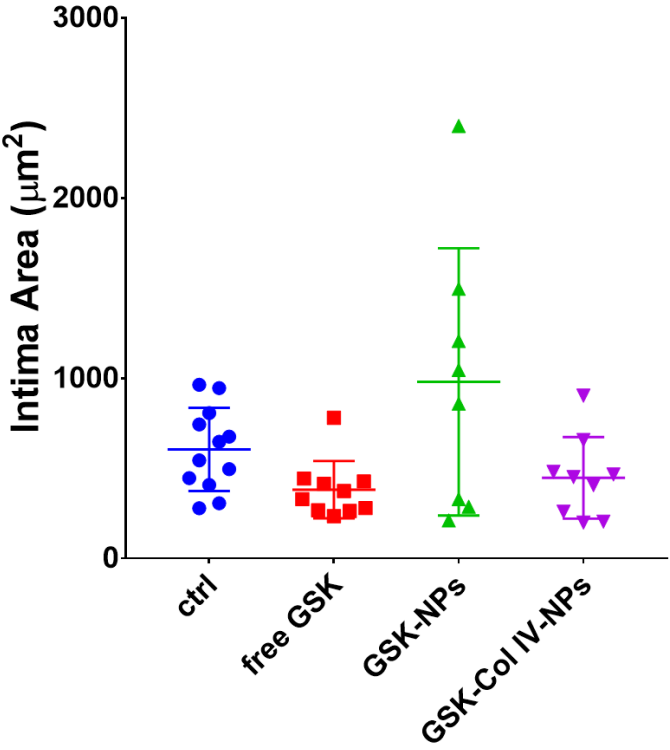

Supplementary Figure 7

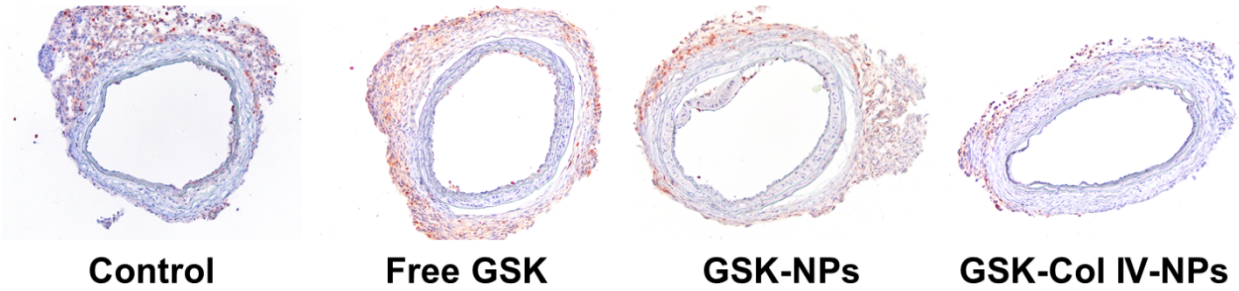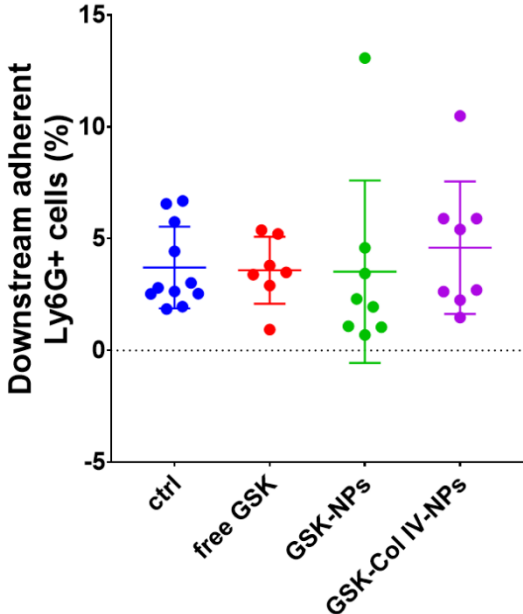



Supplementary Figure 8

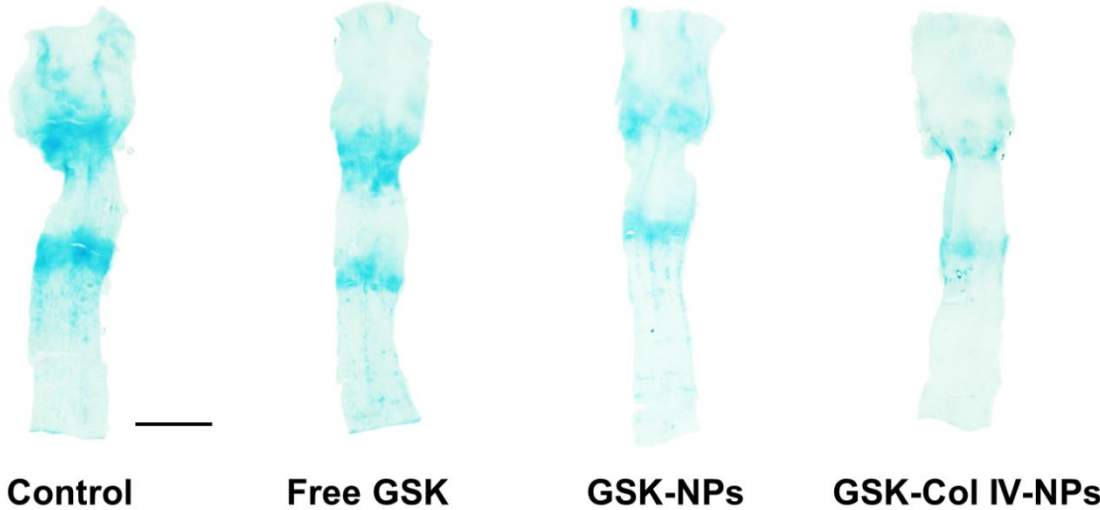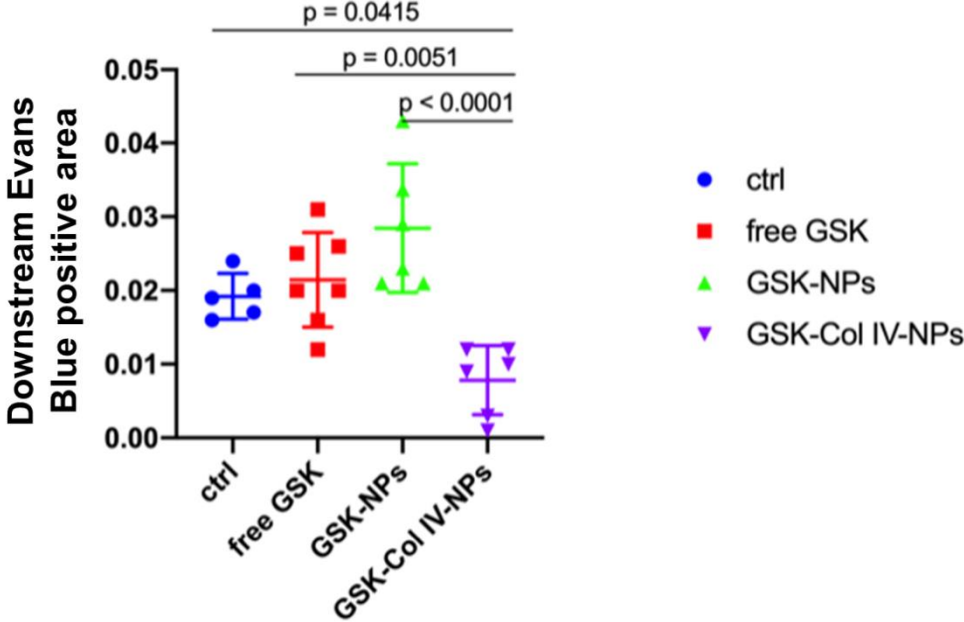

**Supplementary Figure 1** In Vitro Adhesion of NPs to a Collagen IV-coated surface.

The increase of Col IV heptapeptide density on NP surface induces an increase of Col IV NPs adhesion to a Col IV-coated surface. However, no difference was observed between a density of 15 and 30%, thus supporting the use of 15% for further experiments.

**Supplementary Figure 2** Fluorescence reflectance images of RCCA (healthy carotid) and downstream and upstream of LCCA (eroded plaque) in mice injected with bare and Col IV-NPs at 24h post-injection. Quantitative assessment of fluorescence intensities of bare and Col IV-NPs reveals higher accumulation of Col IV-NPs downstream of LCCA compared to upstream ( $p=0.03$ ). No significant difference between downstream and upstream of LCCA was observed for bare NPs ( $p=0.49$ ).

**Supplementary Figure 3** Immunofluorescent staining of Col IV, CD31, and neutrophils (in RED) shows no Col IV-NPs (in RED) localization in RCCA (uninjured carotid).

**Supplementary Figure 4** Representative en face distribution of fluorescently labeled NPs and Col IV-NPs (*red*) to the previously injured LCCA subjected to flow perturbation. Upstream, cuff, and downstream regions of LCCA are illustrated.

**Supplementary Figure 5** Physicochemical characterization of non-targeted NPs. **a)** Dynamic light scattering (DLS) analysis of empty and GSK484 (GSK)-loaded NPs reveals a slight increase of the hydrodynamic size after GSK encapsulation (63 and 73 nm for empty and GSK-NPs, respectively). GSK encapsulation did not significantly affect the homogeneity of the formulations, as indicated by the polydispersity index values before and after GSK encapsulation ( $PDI=0.21$  and  $0.23$ , respectively). **b)** Zeta potential analysis reveals a negative surface charge for both empty and GSK-loaded NPs, without significant changes after GSK encapsulation.

**Supplementary Figure 6** Measurement of intima areas of previously injured LCCA subjected to flow perturbation. The groups ( $n=8-12$ ) did not differ significantly, thus indicating the reproducibility of the experimental procedure.

**Supplementary Figure 7** PAD-4 inhibition through either free or encapsulated GSK484 does not affect neutrophil recruitment downstream the flow perturbation. Immunohistochemical evaluation of previously injured LCCA subjected to flow perturbation from mice (n=8-12) treated with GSK484 (GSK), either alone or encapsulated in bare (GSK-NPs) and Col IV NPs (GSK-Col IV-NPs), stained with anti-Ly6G antibody (neutrophils marker), showed no significant difference in the percentage of adherent neutrophils at sites of eroded plaques.

**Supplementary Figure 8** Representative images (upper panel) of Evans blue exclusion analysis of previously injured (electric injury plus flow disturbance induced by constrictive cuff placement) carotids from ApoE<sup>-/-</sup> mice (n=5-7 per group), untreated (Control) or treated with free, unencapsulated GSK484 (Free GSK) or encapsulated in either bare nanoparticles (GSK-NPs) or Collagen IV-targeting NPs (GSK-Col IV-NPs). Evans Blue coverage analysis reveals impaired barrier function for all groups after flow perturbation. GSK-Col IV-NPs treated mice showed a reduced permeability of the endothelial barrier compared to the other groups (lower panel), thus indicating a beneficial activity of GSK-Col IV-NPs in preserving endothelial continuity and ameliorating the endothelial damage. Scale bar = 500 μm.
